# Supplementary material for: Electrochemical dealloying of Al2(Au,X) (X = Pt, Pd, PtPd, Ni, Co and NiCo) alloys in NaCl aqueous solution
Source: Royal Society of Chemistry journal article supplement (doi:10.1039/c3cp44398a), 2013-01-01
Supplement: c3cp44398a.pdf [file c3cp44398a.pdf]

**Electronic supplementary information (ESI):**

**Electrochemical dealloying of  $\text{Al}_2(\text{Au},\text{X})$  ( $\text{X}=\text{Pt}$ ,  $\text{Pd}$ ,  $\text{PtPd}$ ,  $\text{Ni}$ ,  $\text{Co}$  and  $\text{NiCo}$ ) alloys in  $\text{NaCl}$  aqueous solution**

Yan Wang,<sup>\*</sup> Junling Xu, and Bo Wu

School of Materials Science and Engineering, University of Jinan, Jiwei Road 106, Jinan, 250022,

P.R. China.

\* Corresponding author. Email: mse\_wangy@ujn.edu.cn.

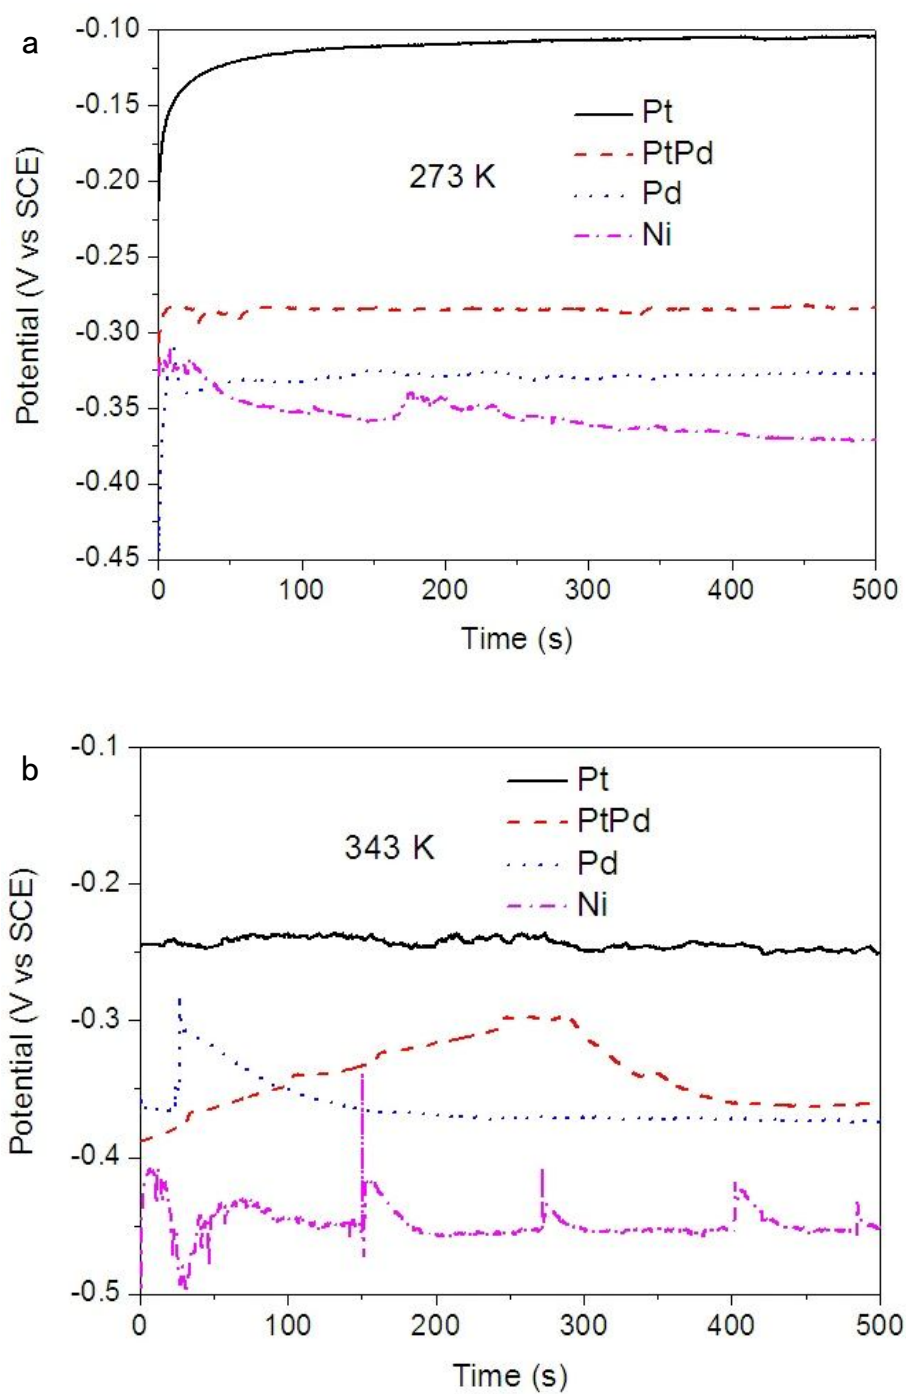

**Fig. S1.** The open-circuit potential vs. time curves of the  $\text{Al}_2(\text{Au},\text{X})$  ( $\text{X}=\text{Pt}$ ,  $\text{Pd}$ ,  $\text{PtPd}$  and  $\text{Ni}$ ) alloys in the 1.0 M NaCl solution at (a) 273 and (b) 343 K.

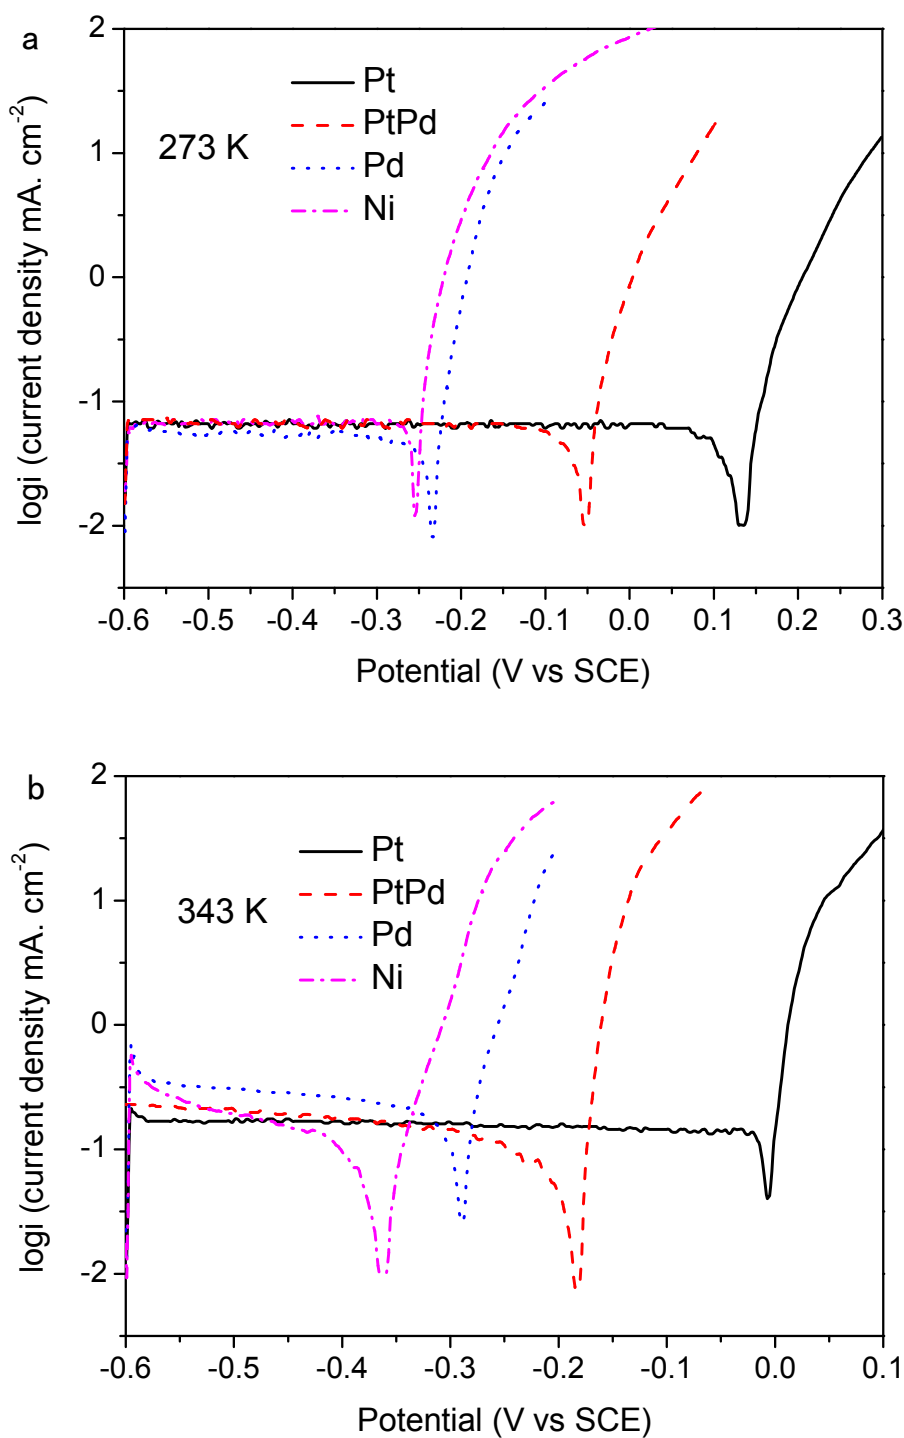

**Fig. S2.** The potentiodynamic polarization curves of the Al<sub>2</sub>(Au,X) (X=Pt, Pd, PtPd and Ni) alloys in the 1.0 M NaCl solution at (a) 273 and (b) 343 K.

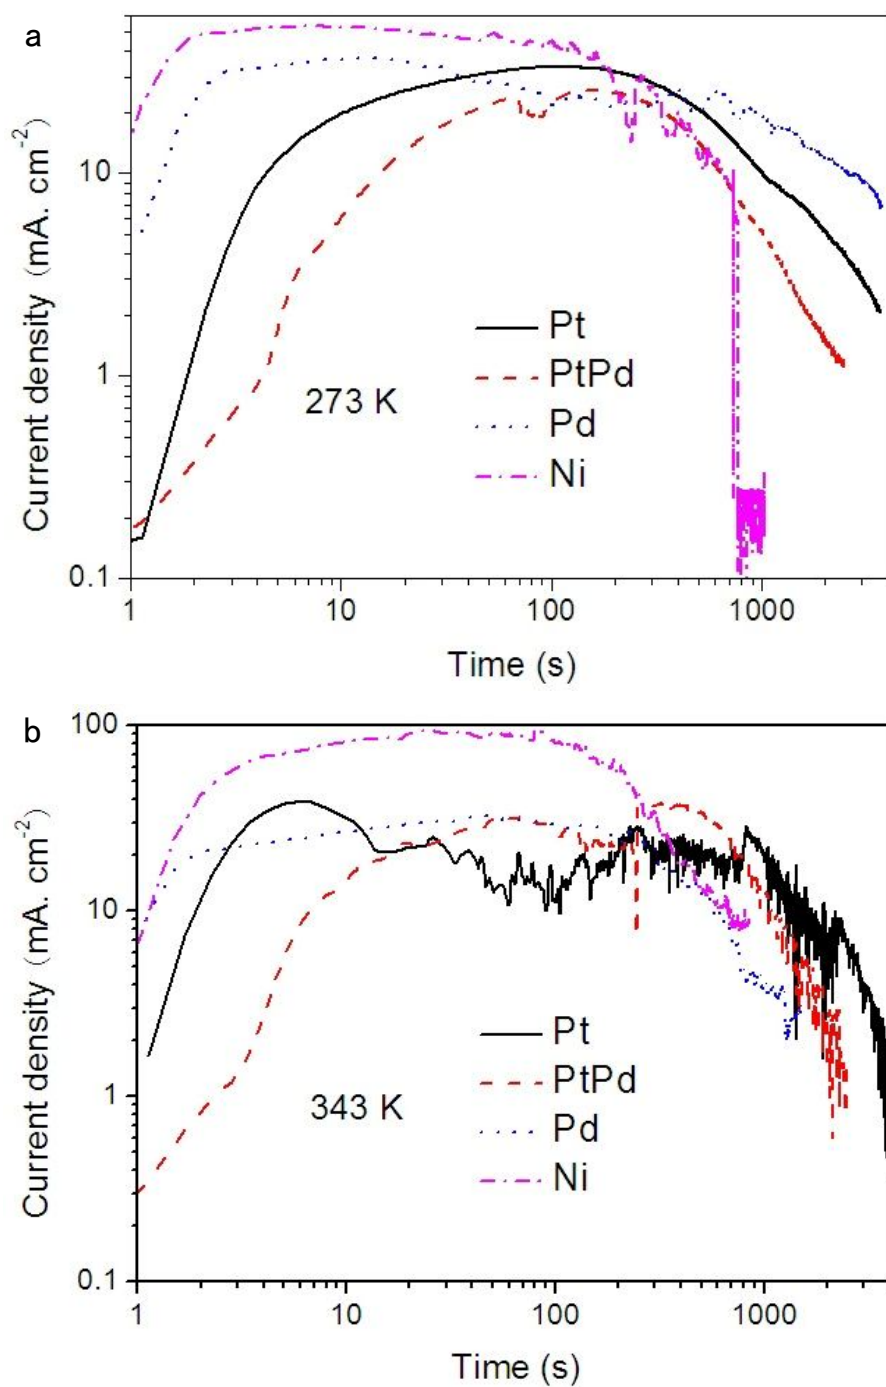

**Fig. S3.** The current density vs. time (chronoamperometric) curves for the potentiostatic dealloying of the  $\text{Al}_2(\text{Au},\text{X})$  ( $\text{X}=\text{Pt}$ ,  $\text{Pd}$ ,  $\text{PtPd}$  and  $\text{Ni}$ ) alloys in the 1.0 M NaCl solution at different overpotentials (100 mV for Pt, Pd and PtPd; 300 mV for Ni) at (a) 273 and (b) 343 K.

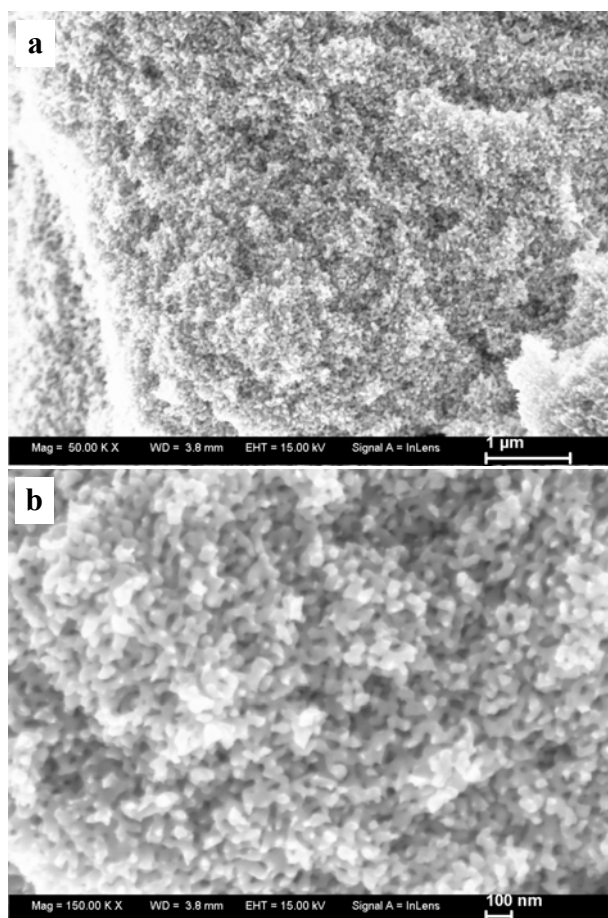

**Fig. S4.** Typical SEM images of np-Au fabricated by electrochemically dealloying pure  $\text{Al}_2\text{Au}$  alloy in 1.0 M NaCl solution at the overpotential of 100 mV and 273 K.

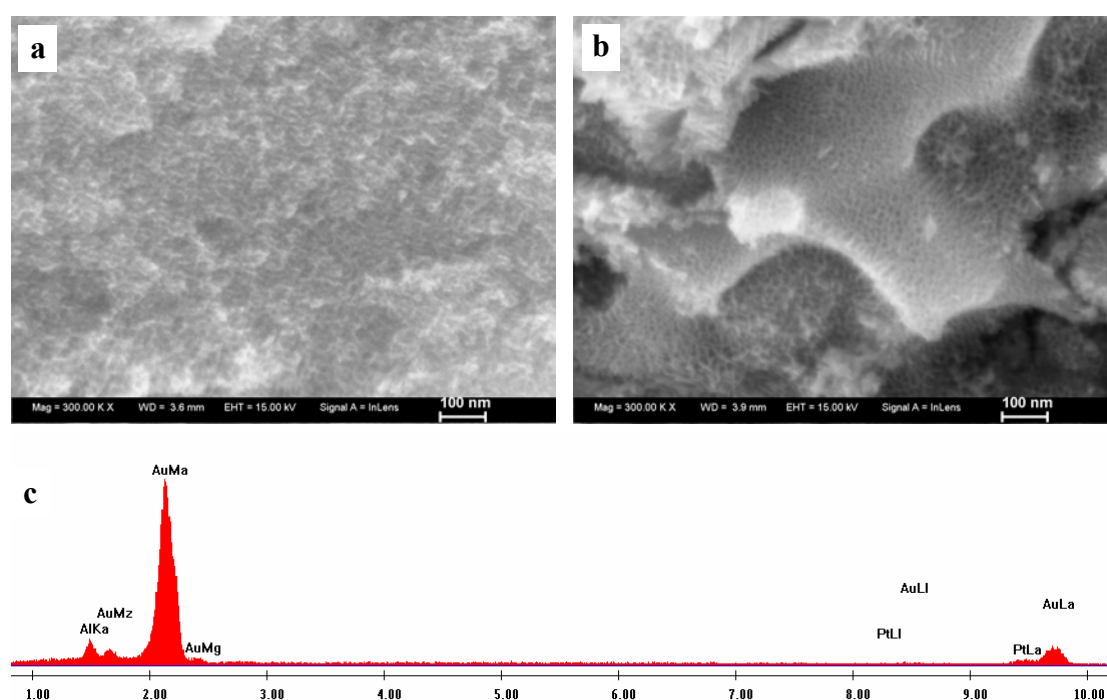

**Fig. S5.** (a,b) SEM images showing the microstructure of the np-AuPt alloy fabricated by potentiostatically dealloying the  $\text{Al}_2(\text{Au,Pt})$  alloy in the 1.0 M NaCl solution at the overpotential of 100 mV and different temperatures (a: 298 K; b: 343 K). (c) EDX spectrum of the sample obtained at 343 K.

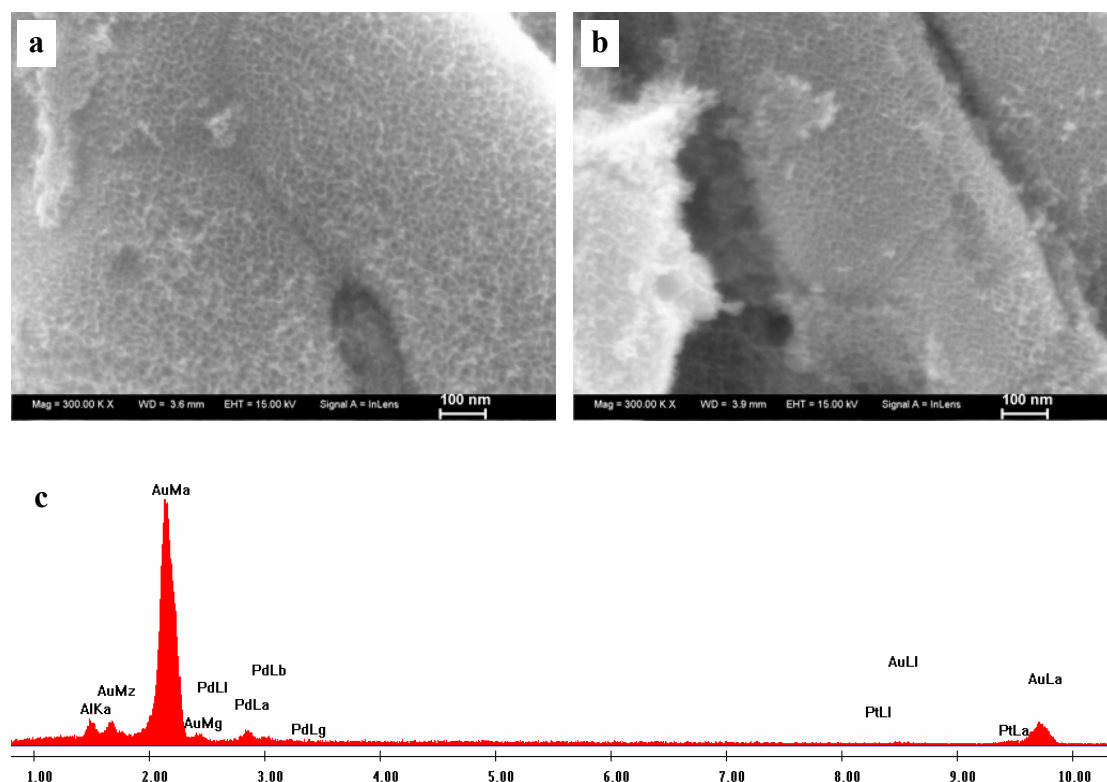

**Fig. S6.** (a,b) SEM images showing the microstructure of the np-AuPtPd alloy fabricated by potentiostatically dealloying the  $\text{Al}_2(\text{Au,Pt,Pd})$  alloy in the 1.0 M NaCl solution at the overpotential of 100 mV and different temperatures (a: 298 K; b: 343 K). (c) EDX spectrum of the sample obtained at 343 K.

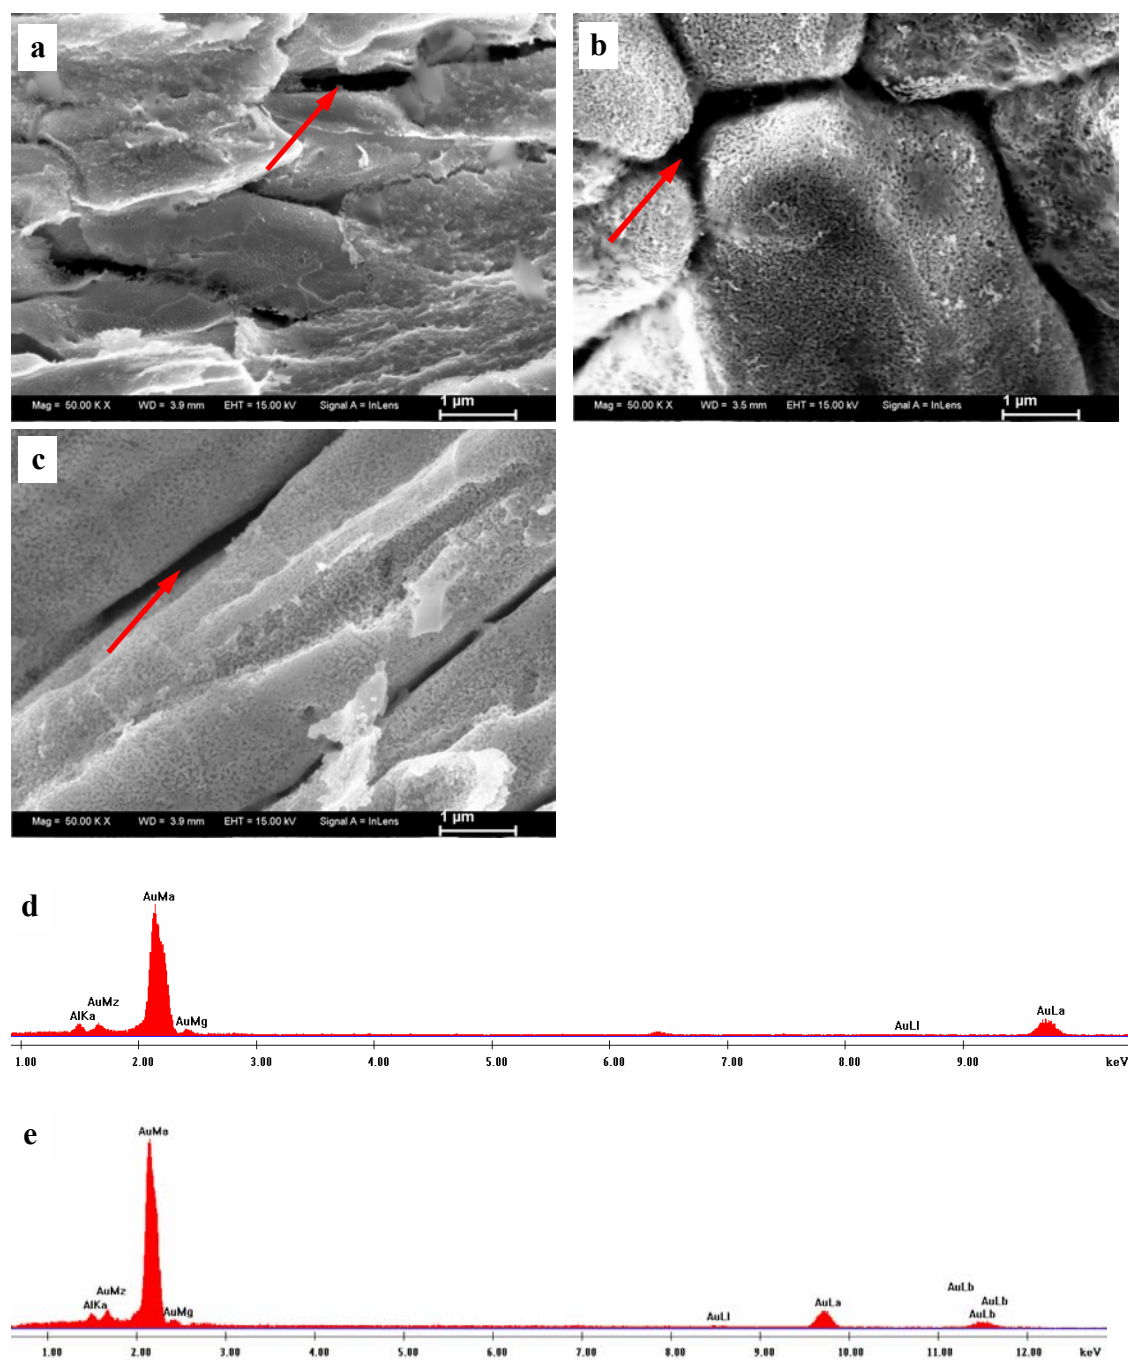

**Fig. S7.** (a-c) SEM images showing the microstructure of the np-Au samples fabricated by potentiostatically dealloying the (a,b) Al<sub>2</sub>(Au,Ni) and (c) Al<sub>2</sub>(Au,Co) alloys in the 1.0 M NaCl solution at the overpotential of 300 mV and different temperatures (a: 273 K; b,c: 298 K). (d,e) EDX spectra of the np-Au samples fabricated by potentiostatically dealloying the Al<sub>2</sub>(Au,Ni) and Al<sub>2</sub>(Au,Co) alloys respectively.



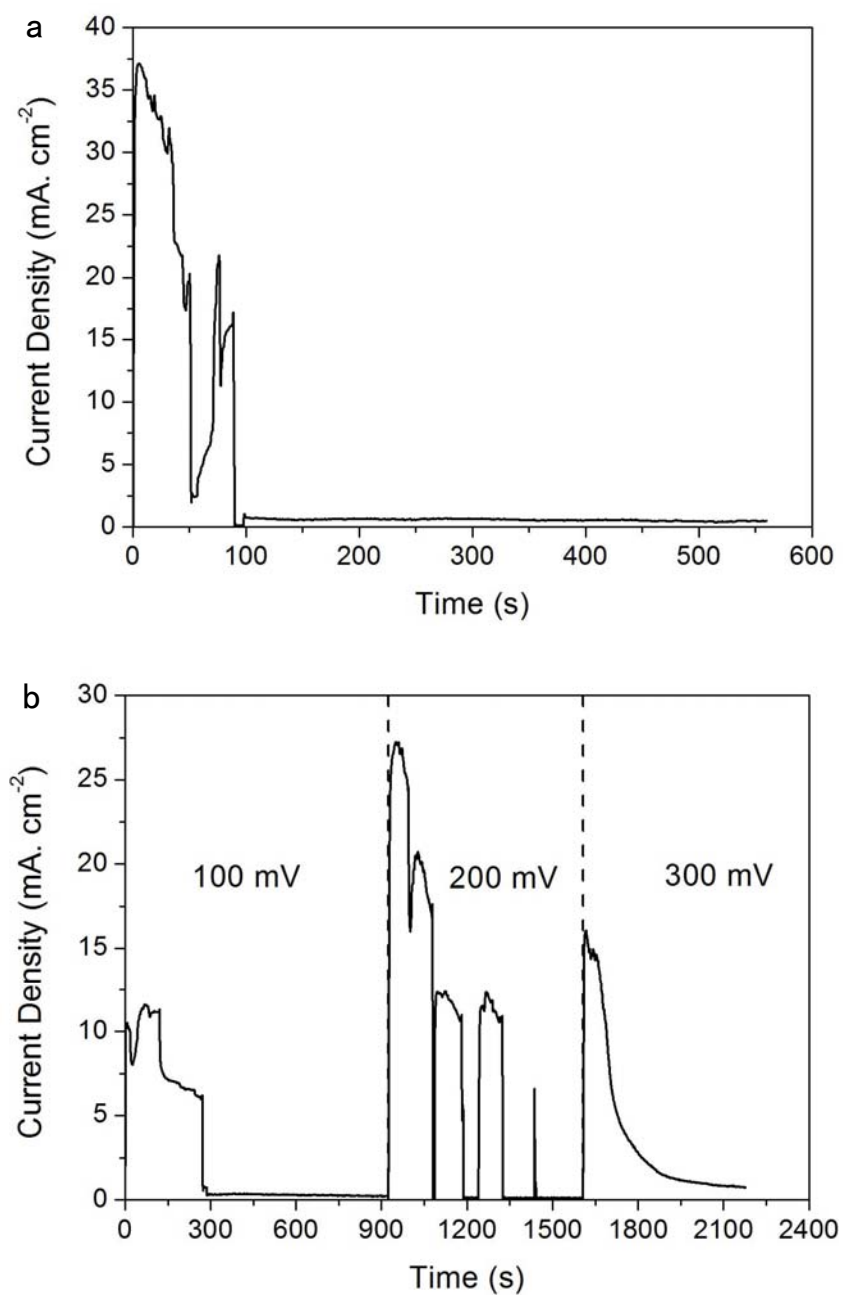

**Fig. S8.** The current density vs. time (chronoamperometric) curve for (a) one-stage (at the overpotential of 300 mV) and (b) three-stage (successive application of overpotentials of 100, 200 and 300 mV) potentiostatic dealloying of the  $\text{Al}_2(\text{Au,Ni,Co})$  alloy in the 1.0 M NaCl solution at 298 K.
